# Supplementary material
Source: HighWire-hosted journal article supplement (http://www.qdcxjkg.com/highwire/filestream/126816/field_highwire_adjunct_files/0/ERJ-01209-2015_Suppl.pdf)

## ONLINE DATA SUPPLEMENT

### **T cell receptor-HLA-DRB1 associations suggest specific antigens in pulmonary sarcoidosis**

Johan Grunewald<sup>1\*</sup>, Ylva Kaiser<sup>1</sup>, Mahyar Ostadkarampour<sup>1</sup>, Natalia V Rivera<sup>1</sup>, Francesco Vezzi<sup>2</sup>, Britta Lötstedt<sup>3</sup>, Remi-André Olsen<sup>2</sup>, Lina Sylwan<sup>3</sup>, Sverker Lundin<sup>4</sup>, Max Käller<sup>4</sup>, Tatiana Sandalova<sup>5</sup>, Kerstin Ahlgren<sup>1</sup>, Jan Wahlström<sup>1</sup>, Adnane Achour<sup>5</sup>, Marcus Ronninger<sup>1</sup>, Anders Eklund<sup>1</sup>.

<sup>1</sup>Respiratory Medicine Unit, Department of Medicine Solna and CMM, Karolinska Institutet and Karolinska University Hospital, Solna, Sweden.

<sup>2</sup>Science for Life Laboratory (SciLifeLab), Department of Biochemistry and Biophysics, Stockholm University, Stockholm, Sweden

<sup>3</sup>Science for Life Laboratory (SciLifeLab), Department of Biosciences and Nutrition, Karolinska Institutet, Solna, Sweden

<sup>4</sup>Science for Life Laboratory (SciLifeLab), Royal Institute of Technology (KTH), Gene Technology, 171 65 Solna, Sweden,

<sup>5</sup>Science for Life Laboratory (SciLifeLab), Department of Medicine Solna, Karolinska Institutet, Stockholm, Sweden.

## Supplementary Material and Methods

### *HLA typing*

Genomic DNA was extracted from whole blood samples and HLA-DRB1 and DRB3 alleles were determined using the PCR-SSP (SSP = sequence-specific primers) technique (Olerup SSP DR low resolution kit, Saltsjöbaden, Sweden) (S1).

### *Flow cytometry*

BAL fluid T cells were stained using the following antibodies: CD3-Pacific Blue, clone UCHT1 (BD Pharmingen, San Diego, CA, USA), CD4-APC-H7, clone SK3 (BD Biosciences, San Jose, CA, USA), V $\alpha$ 2.3-FITC, clone F1 (Thermo Scientific, Rockford, IL, USA) and V $\beta$ 22-PE, clone IMMU 546 (Beckman Coulter Immunotech, Marseille, France) (S2). For assessment of cell activation, we also included CD27-PerCP-Cy5.5, clone M-T271 and CD69-PE-Cy7, clone FN50 (BD Pharmingen). Flow cytometry was run on a BD FACS Canto II (Beckton Dickinson, San Jose, CA, USA) and results were analysed using BD FACSDiva v.8.0 and FlowJo X (TreeStar, Ashland, OR, USA) softwares.

### *mRNA extraction and cDNA generation*

Total cellular mRNA was extracted either from FACS-sorted cells or from total BAL cells ( $3 \times 10^6$  to  $10 \times 10^6$ , depending on cell availability) using the RNeasy Plus Mini Kit (Qiagen, Hilden, Germany), according to manufacturer's protocol. Complementary DNA (cDNA) was generated from total RNA using the High-Capacity cDNA Reverse Transcription Kit, containing a dNTP mix, RT random primers and MultiScribe reverse transcriptase (Applied Biosystems, **Waltham, MA, USA**), following manufacturer's instructions.

### *TCR $\alpha$ and $\beta$ gene amplification*

PCR amplification of V $\alpha$ 2.3 and V $\beta$ 22 genomic regions, respectively, was performed using a specific variable (V) region oligonucleotide forward primer and a conserved constant (C) region reverse primer for each TCR chain. Sequences for the primers used were as follows:

Forward V $\alpha$ 2.3 5'–GTGTTCCAGAGGGAGCCATTGCC–3', Reverse C $\alpha$  5'–

AATAGGTCGACAGACTTGTCCTGGA–3'. Forward V $\beta$ 22 5'–

AGGACCAGATGCCTGAGCTA–3', Reverse C $\beta$  5'–CTGGGTCCACTCGTCATTCT–3'.

12.5  $\mu$ l REDTaq ReadyMix PCR Reaction Mix (Sigma-Aldrich, Saint Louis, MO, USA)

containing standard Taq DNA polymerase, optimised buffer components and inert dye (for agarose gel visualisation of PCR products) was added to 8  $\mu$ l cDNA and 10  $\mu$ M primers to

yield a final reaction volume of 25  $\mu$ l. PCR reactions were carried out in a 2720 Thermal

Cycler system (Applied Biosystems) under the following conditions for V $\alpha$ 2.3: initialisation

94°C 1 min; denaturation 94°C 1 min, annealing 55°C 1.5 min and elongation 72°C 1 min,

repeated in 40 cycles; final elongation 72°C, 10 min. The same procedure was performed for

V $\beta$ 22, except for an annealing temperature of 51°C and 42 cycles. PCR products were

quality-assessed by loading 10  $\mu$ l of each sample and 3  $\mu$ l CoralRed ladder onto a 1.5%

agarose gel stained with GelRed Nucleic Acid Gel Stain 10,000X (Biotium, Hayward, CA,

USA) in 1X TAE buffer. Electrophoresis was performed at a constant voltage of 100V for 1.5

h, followed by visualisation under UV light.

### *Three-dimensional molecular modelling of ternary TCR/DRB1\*0301/peptide complexes*

V $\alpha$ 2.3/V $\beta$ 22 TCR sequences were retrieved from the IMGT database (S3), according to which

V $\alpha$ 2.3/V $\beta$ 22 CDR-loops comprise five or six residues within the sequences NSASQS, SNHLY,

VYSSGN and FYNNEI for CDR1 $\alpha$ , CDR1 $\beta$ , CDR2 $\alpha$  and CDR2 $\beta$ , respectively. The lengths of

these loops correspond to lengths observed in crystal structures of TCRs with 5-8 residues per CDR1/2 loop. While the CDR1 $\alpha$ , CDR2 $\alpha$  and CDR2 $\beta$  loops of V $\alpha$ 2.3/V $\beta$ 22 TCRs comprise six residues (NSASQS, VYSSGN, FYNNEI, respectively), the CDR1 $\beta$  loop consists of only five residues (SNHLY). All modelling was performed manually using the COOT program (S4). No ternary crystal structure of the DRB1\*0301 allele in complex with a TCR is yet available. The crystal structure of the Ob.1A12 TCR in complex with HLA-DRB1\*1501 and the myelin basic protein-derived peptide 85-98 (Protein Database Base (PDB) code 1YMM) (S5), was used as a template for modelling. The HLA molecule was replaced by the crystal structure of the DRA1/DRB1\*0301/CLIP complex (PDB code 1A6A) (S6). The TCR CDR1/2 loops were changed to sequences corresponding to V $\alpha$ 2.3/V $\beta$ 22 classes (Table 3). Based on this template, TCR models were created with different CDR3  $\alpha/\beta$  chains. Adequate residues were mutated to correct sequences of targeted CDR3 loops and structure idealisation was thereafter performed in COOT using the “sphere regularisation” option in order to remove unfavourable contacts between residues.

### ***Mate pair sequencing library preparation and sequencing***

**A common sequencing library for each sample was prepared by pooling the two PCR reactions and by the Illumina Nextera XT kit (Illumina, San Diego, CA, USA). The work was done following the protocol from the manufacturer, except the following steps that were adapted for automation on an Agilent NGS workstation (Agilent, Santa Clara, CA, USA): tagmentation (enzymatic fragmentation and adapter ligation), PCR amplification and finally amplicon purification using Dynabeads MyOne carboxylic acid beads (Thermo Fischer Scientific, Waltham, MA, USA) (S7). Libraries were normalised and pooled for MiSeq 2x250 sequencing.**

**By using this approach for library preparation, PCR-amplicons longer than the total read length (2x250 bp in this case) can be used since the tagmentation reaction randomly fragments the DNA amplicons and prepares the whole of them for DNA sequencing. This approach facilitate a counting of reads from individual TCR clone transcripts and thus measuring the relative abundance of the clones in each isolate without the need for, for instance, individual cloning and Sanger DNA sequencing.**

### ***De novo transcript assembly***

**In order to bioinformatically process the samples the following pipeline has been designed:**

**(i) adaptor removal and trimming of low quality sequence ends using Trimmomatic (S8); (ii) discarding of read-pairs whose length was shorter than 150 base pairs; (iii) down-sampling of the survived sequences; (iv) *de novo* assembling of the subsampled set using Trinity (S9); (v) computing transcript abundance estimates using RSEM (S10).**

**Points (i), (ii), and (iii) are typical *de novo* assembly pre-processing steps. In particular, points (i) and (ii) allow us to exclude from downstream analysis shorter fragments which may stem from impurities. Point (iii), was implemented to level out all samples and run downstream analysis on a uniform set of data points. For this purpose, we decided to select 80.000 reads for each sample as this allowed us to have the same coverage across all samples. The transcript assembler Trinity was used in point (iv) to find the original spliced mRNA sequences, including the variable splice-site nucleotides, without using a reference sequence. It produced between 1 and 200 assembled transcripts for each sample. In point (v) RSEM has been used to perform abundance estimates in order to evaluate which is most likely to be the target amplicon. The most abundant sequences (*i.e.* has the most support in the sequencing data) have been selected for downstream analysis. In doing this we assume**

**that the less frequent sequences are likely to be the consequence of misassemblies or impurities.**

*DNA-sequence bioinformatic analysis*

The resulting sequences were functionally analysed with tools made available by IMGT (S11), which include a comprehensive database of T cell receptor nucleotide sequences of human origin. IMGT/V-QUEST was used to identify T cell receptor domains and amino acid sequences and their positions in CDR3 regions. Comparison of amino acid frequency and sequences for all T cell CDR3 junctions of human origin was performed using IMGT/LIGM-DB, and subsequently used for statistical analysis by the Chi-square test;  $p < 0.05$  was considered significant.

## References

- S1.** Olerup O, Zetterquist H. HLA-DR typing by PCR amplification with sequence-specific primers (PCR-SSP) in 2 hours: an alternative to serological DR typing in clinical practice including donor-recipient matching in cadaveric transplantation. *Tissue Antigens*. 1992;39(5):225-35.
- S2.** Ahlgren KM, Ruckdeschel T, Eklund A, Wahlstrom J, Grunewald J. T cell receptor-Vbeta repertoires in lung and blood CD4+ and CD8+ T cells of pulmonary sarcoidosis patients. *BMC Pulm Med*. 2014;14:50.
- S3.** Ehrenmann F, Kaas Q, Lefranc MP. IMGT/3Dstructure-DB and IMGT/DomainGapAlign: a database and a tool for immunoglobulins or antibodies, T cell receptors, MHC, IgSF and MhcSF. *Nucleic Acids Res*. 2010;38(Database issue):D301-7.
- S4.** Emsley P, Lohkamp B, Scott WG, Cowtan K. Features and development of Coot. *Acta Crystallogr D Biol Crystallogr*. 2010;66(Pt 4):486-501.
- S5.** Hahn M, Nicholson MJ, Pyrdol J, Wucherpfennig KW. Unconventional topology of self peptide-major histocompatibility complex binding by a human autoimmune T cell receptor. *Nat Immunol*. 2005;6(5):490-6.
- S6.** Wahlstrom J, Dengjel J, Persson B, Duyar H, Rammensee HG, Stevanovic S, et al. Identification of HLA-DR-bound peptides presented by human bronchoalveolar lavage cells in sarcoidosis. *J Clin Invest*. 2007;117(11):3576-82.
- S7.** Lefranc MP. IMGT, The International ImMunoGeneTics Information System, <http://imgt.cines.fr>. *Methods Mol Biol*. 2004;248:27-49.

**S8.** Bolger AM, Lohse M, Usadel B. Trimmomatic: a flexible trimmer for Illumina sequence data. *Bioinformatics*. 2014;30(15):2114-20.

**S9.** Grabherr MG, Haas BJ, Yassour M, Levin JZ, Thompson DA, Amit I, et al. Full-length transcriptome assembly from RNA-Seq data without a reference genome. *Nat Biotechnol*. 2011;29(7):644-52.

**S10.** Li B, Dewey CN. RSEM: accurate transcript quantification from RNA-Seq data with or without a reference genome. *BMC Bioinformatics*. 2011;12:323.

**S11.** Lefranc MP, Giudicelli V, Ginestoux C, Jabado-Michaloud J, Folch G, Bellahcene F, et al. IMGT, the international ImMunoGeneTics information system. *Nucleic Acids Res*. 2009;37(Database issue):D1006-12.



**Table S1.** Clinical characteristics of HLA-DRB1\*03 negative patients, divided into DRB3\*01 positive or DRB3\*01 negative patients.

|                                                               | Among HLA-DRB1*03 negative and DRB3*01 positive patients (n=6) | Among HLA-DRB1*03 negative and DRB3*01 negative patients (n=11) |
|---------------------------------------------------------------|----------------------------------------------------------------|-----------------------------------------------------------------|
| Sex (male/female)                                             | 5/1                                                            | 7/4                                                             |
| Age, years                                                    | 35.0 (33.0-38.5)                                               | 59.0 (43.5-65.0)                                                |
| LS                                                            | 3                                                              | 1                                                               |
| Smoking status (non-smoker/former/current)                    | 3/1/2                                                          | 5/6/0                                                           |
| <sup>1</sup> Chest radiographic stage 0/I/II/III/IV           | 0/1/5/0/0                                                      | 0/4/4/2/1                                                       |
| <sup>2</sup> VC (% of predicted)                              | 80.0 (75.0-92.0)                                               | 85.0 (78.0-93.0)                                                |
| FEV1 (% of predicted)                                         | 79.0 (76.0-83.0)                                               | 73.0 (63.5-84.5)                                                |
| DLCO (% of predicted)                                         | 84.0 (77.5-86.5)                                               | 84.0 (75.5-94.0)                                                |
| % BAL recovery                                                | 61.0 (60.3-67.0)                                               | 60.0 (47.0-69.5)                                                |
| <sup>3</sup> BAL cell concentration (10 <sup>6</sup> cells/L) | 296.3 (238.0-399.7)                                            | 198.0 (101.1-333.8)                                             |
| % BALF macrophages                                            | 53.2 (45.1-74.2)                                               | 73.6 (51.8-79.7)                                                |
| % BALF lymphocytes                                            | 45.8 (24.0-53.2)                                               | 25.6 (17.9-45.0)                                                |
| % BALF neutrophils                                            | 1.5 (0.7-1.6)                                                  | 1.2 (0.8-2.0)                                                   |
| % BALF eosinophils                                            | 0.2 (0.0-0.6)                                                  | 0.2 (0.0-0.6)                                                   |
| BAL CD4/CD8 ratio                                             | 11.8 (7.3-15.5)                                                | 6.0 (2.7-8.1)                                                   |

<sup>1</sup>Chest radiography staging as follows: stage 0 = normal chest radiography, stage I = enlarged lymph nodes, stage II = enlarged lymph nodes with parenchymal infiltrates, stage III = parenchymal infiltrates without enlarged lymph nodes and stage IV = signs of pulmonary fibrosis.

<sup>2</sup>VC= vital capacity, FEV1=forced expiratory volume in one second, DLCO= carbon monoxide diffusing capacity.

<sup>3</sup>BAL basophils and mast cells were excluded from the cell differential counts.

All percentage values are denoted as median (p25-p75).

**Table S2.** Summary of all BAL CD4<sup>+</sup> T lymphocytes that express V $\alpha$ 2.3, V $\beta$ 22, and V $\alpha$ 2.3 together with V $\beta$ 22. % of V $\alpha$ 2.3<sup>+</sup> CD4<sup>+</sup> BAL T cells that express V $\beta$ 22, and % of V $\beta$ 22<sup>+</sup> CD4<sup>+</sup> BAL T cells that express V $\alpha$ 2.3 are also stated.

All data are shown for HLA-DRB1\*03 negative patients divided into DRB3\*01 positive or DRB3\*01 negative patients.

|                                                                                          | Among HLA-DRB1*03<br>negative and DRB3*01<br>positive patients (n=6) | Among DRB1*03<br>negative and DRB3*01<br>negative patients (n=11) |
|------------------------------------------------------------------------------------------|----------------------------------------------------------------------|-------------------------------------------------------------------|
| % V $\alpha$ 2.3 <sup>+</sup> of BAL CD4 <sup>+</sup> T cells                            | 18.1 (17.0-19.0)                                                     | 4.5 (4.3-5.1)                                                     |
| % V $\beta$ 22 <sup>+</sup> of BAL CD4 <sup>+</sup> T cells                              | 2.7 (2.3-3.2)                                                        | 2.0 (1.3-3.3)                                                     |
| % V $\alpha$ 2.3 <sup>+</sup> /V $\beta$ 22 <sup>+</sup> of BAL CD4 <sup>+</sup> T cells | 0.8 (0.7-1.2)                                                        | 0.2 (0.2-0.3)                                                     |
| % V $\alpha$ 2.3 <sup>+</sup> CD4 <sup>+</sup> BAL T cells that express V $\beta$ 22     | 5.4 (3.5-6.2)                                                        | 3.8 (2.7-9.1)                                                     |
| % V $\beta$ 22 <sup>+</sup> CD4 <sup>+</sup> BAL T cells that express V $\alpha$ 2.3     | 24.1 (18.0-30.1)                                                     | 7.6 (6.1-11.9)                                                    |

All percentage values are denoted as median (p25-p75).

**Table S3.** Results of TCR sequencing for mRNA extracted from FACS-sorted V $\alpha$ 2.3+ V $\beta$ 22- T cells (left column) from patients 12, 13, 2 and 3 (same as in Table 3) and FACS-sorted V $\alpha$ 2.3-V $\beta$ 22+ T cells (right column), respectively, from patients 2 and 3.

| Sample ID  | HLA-type   | V $\alpha$ 2.3       |           |         |             | V $\beta$ 22      |           |        |             |
|------------|------------|----------------------|-----------|---------|-------------|-------------------|-----------|--------|-------------|
|            |            | a.a. sequence        | Freq. (%) | TRAJ    | CDR3 length | a.a. sequence     | Freq. (%) | TRBJ   | CDR3 length |
| Patient 12 | DRB1*03,04 | <b>CVVNMAGNQFYF</b>  | 100       | 49*01 F | 10          |                   |           |        |             |
| Patient 13 | DRB1*03,04 | CVVNMAGGSQGNLIF      | 100       | 42*01 F | 13          |                   |           |        |             |
| Patient 2  | DRB1*03,01 | CVVTRYGGSQGNLIF      | 35.31     | 42*01 F | 13          | CASSGGTSGVSYNEQFF | 23.32     | 2-1*01 | 15          |
|            |            | CVVNKAGGSYIPTF       | 64.69     | 6*01 F  | 12          | CASSETVAGGAQFF    | 27.68     | 2-1*01 | 12          |
|            |            |                      |           |         |             | CASSEISGSGNTIYF   | 48.34     | 1-3*01 | 13          |
| Patient 3  | DRB1*03,13 | CVVNMVGGGSNYKLTF     | 13.33     | 53*01 F | 14          | CARGGSRDEQFF      | 57.03     | 2-1*01 | 10          |
|            |            | <b>CVVNPGTGNQFYF</b> | 19.8      | 49*01 F | 11          | CASSRAPGTGPRETQYF | 40.7      | 2-5*01 | 15          |
|            |            | CVVNGANAGKSTF        | 25.95     | 27*01 F | 11          |                   |           |        |             |
|            |            | CVVTHNNARLMF         | 40.91     | 31*01 F | 10          |                   |           |        |             |

**a.a.** refers to amino acid sequence.

**Freq. (%)** refers to the percentage of reads mapped to every given transcript (isoforms with > 10% frequency).

In cases where the total percentage is < 100%, the remaining sequences were either too short or did not align.

The designations **TRAJ** and **TRBJ** follow the IMGT TCR gene nomenclature.

Length of CDR3 region as derived from the IMGT database.

V $\alpha$ 2.3<sup>+</sup> sequences (highlighted in grey/bold font) share the 49\*01 J segment and identical or near-identical amino acid sequences.

**Table S4.** Amino acid and nucleotide sequences for Va2.3<sup>+</sup> and Vb22<sup>+</sup> chains of patients 1-7.

|           |                      | <b>Vα2.3</b>                                                                    |
|-----------|----------------------|---------------------------------------------------------------------------------|
| Sample ID | a.a. sequence        | Nucleotide sequence                                                             |
| Patient 1 | CVVNTPGNTPLVF        | TGT GTG AAC ACC CCA GGA AAC ACA CCT CTT GTC TTT                                 |
|           | CVVNMGNTGGFKTIF      | TGT GTG GTG AAC ATG GGG AAT ACT GGA GGC TTC AAA ACT ATC TTT                     |
| Patient 2 | CVVNIGYGKLVF         | TGT GTG GTG AAC ATC GGA TAT GGA AAC AAA CTG GTC TTT                             |
|           | CVVSVQGAQKLVF        | TGT GTG GTG AGC GTT CAG GGA GCC CAG AAG CTG GTA TTT                             |
|           | CVVNGLNIGDSGGGADGLTF | TGT GTG GTG AAC GGT CTT AAT ATA GGC GAT TCA GGA GGA GGT GCT GAC GGA CTC ACC TTT |
| Patient 3 | CVVNNYKLSF           | TGT GTG GTG AAC AAC TAC AAG CTC AGC TTT                                         |
| Patient 4 | CVVNMGRGGSNYKLTF     | TGT GTG GTG AAC ATG GGG CGT GGA GGT AGC AAC TAT AAA CTG ACA TTT                 |
|           | CVVGINNRKLIW         | TGT GTG GTG GGG ATC AAC AAC CGT AAG CTG ATT TGG                                 |
|           | CVVNVPRPGNTPLVF      | TGT GTG GTG AAC GTA CGA CCA GGA AAC ACA CCT CTT GTC TTT                         |
| Patient 5 | <b>CVVNLAGNQFYF</b>  | TGT GTG GTG AAC CTA GCC GGT AAC CAG TTC TAT TTT                                 |
|           | CVVNPLGGGSYIPTF      | TGT GTG GTG AAC CCT TTA GGG GGA GGA AGC TAC ATA CCT ACA TTT                     |
| Patient 6 | CVVKEGSYIPTF         | TGT GTG GTG AAA GAA GGA AGC TAC ATA CCT ACA TTT                                 |
|           | CAVKSGNNRLAF         | TGT GCC GTG AAA AGC GGG AAC AAC AGA CTC GCT TTT                                 |
|           | CVVNMEYGNKLVF        | TGT GTG GTG AAC ATG GAA TAT GGA AAC AAA CTG GTC TTT                             |
| Patient 7 | CVVIGSGGSQGNLIF      | TGT GTG GTG ATA GGA AGT GGA GGA AGC CAA GGA AAT CTC ATC TTT                     |
|           | <b>CVVNLAGNQFYF</b>  | TGT GTG GTG AAC CTT GCC GGT AAC CAG TTC TAT TTT                                 |

**Note the different nucleotide sequences coding for the same amino acid (L) at the 5th amino acid position of the Vα2.3 chains in patients 5 and 7.**

**B**

| <b>vβ22</b> |                 |                                                             |
|-------------|-----------------|-------------------------------------------------------------|
| Sample ID   | a.a. sequence   | Nucleotide sequence                                         |
| Patient 1   | CASSEQGRGETQYF  | TGT GCC AGC AGT GAA CAG GGG CGC GGG GAG ACC CAG TAC TTC     |
|             | CASSGTSVSTGELFF | TGT GCC AGC AGT GGG ACT AGC GTT TCC ACC GGG GAG CTG TTT TTT |
| Patient 2   | CASSGPGGRTEAFF  | TGT GCC AGC AGT GGT CCA GGG GGG AGA ACC GAA GCT TTC TTT     |
|             | CASSEMTRVVFHF   | TGT GCC AGC AGT GAA ATG ACT CGG GTG GTC TTC CAC TTT         |
|             | CASSVITSGELFF   | TGT GCC AGC AGT GTG ATC ACC TCC GGG GAG CTG TTT TTT         |
| Patient 3   | CASSGTGGAGTEAFF | TGT GCC AGC AGT GGC ACA GGG GGC GCC GGC ACT GAA GCT TTC TTT |
|             | CASSEDVGRGAAFF  | TGT GCC AGC AGT GAA GAC GTC GGT CGG GGG GCA GCT TTC TTT     |
|             | CASSGGFEQYF     | TGT GCC AGC AGT GGG GGG TTC GAG CAG TAC TTC                 |
| Patient 4   | CASSGGHKGKEQFF  | TGT GCC AGC AGT GGC GGA CAC GGA AAG GGT GAG CAG TTC TTC     |
|             | CASSGAGGRGNEQFF | TGT GCC AGC AGT GGG GCA GGG GGC AGA GGC AAT GAG CAG TTC TTC |
| Patient 5   | CASSVSTDTQYF    | TGT GCC AGC AGT GTG AGC AGA GAT ACG CAG TAT TTT             |
|             | CASSEFGQGGHEQYF | TGT GCC AGC AGT GAG TTC GGA CAG GGG GGC CAC GAG CAG TAC TTC |
| Patient 6   | CASSIDRSVGEKLF  | TGT GCC AGC AGT ATC GAC AGG AGT GTT GGT GAA AAA CTG TTT TTT |
|             | CASSGTARNYGYTF  | TGT GCC AGC AGT GGT ACG GCA AGG AAC TAT GGC TAC ACC TTC     |
| Patient 7   | CASSAITSNEKLF   | TGT GCC AGC AGT GCA ATT ACA TGT AAT GAA AAA CTG TTT TTT     |
|             | CASSAGSGQPQHF   | TGT GCC AGC AGT GCA GGG TCG GGC CAG CCC CAG CAT TTT         |
|             | CASRPTSGRSDEQFF | TGT GCC AGC AGA CCA ACT AGC GGG CGT TCG GAT GAG CAG TTC TTC |
|             | CASSVLGTAAVTF   | TGT GCC AGC AGT GTT CTA GGG ACC GCG GCT GTA ACT TTC         |

Figure S1. Moderate  $V\alpha 2.3^+V\beta 22^+$  BAL T cell expansions in HLA-DRB1\*03<sup>-</sup>DRB3\*01<sup>+</sup> patients.

(A-B) Relative numbers of BAL T cells expressing TCR  $V\alpha 2.3$  (A) or TCR  $V\alpha 2.3/V\beta 22$  (B) in DRB1\*03<sup>+</sup> ( $n = 26$ ), DRB1\*03<sup>-</sup>/DRB3\*01<sup>+</sup> ( $n = 6$ ), and DRB1\*03<sup>-</sup>/DRB3\*01<sup>-</sup> patients ( $n = 11$ ), respectively.

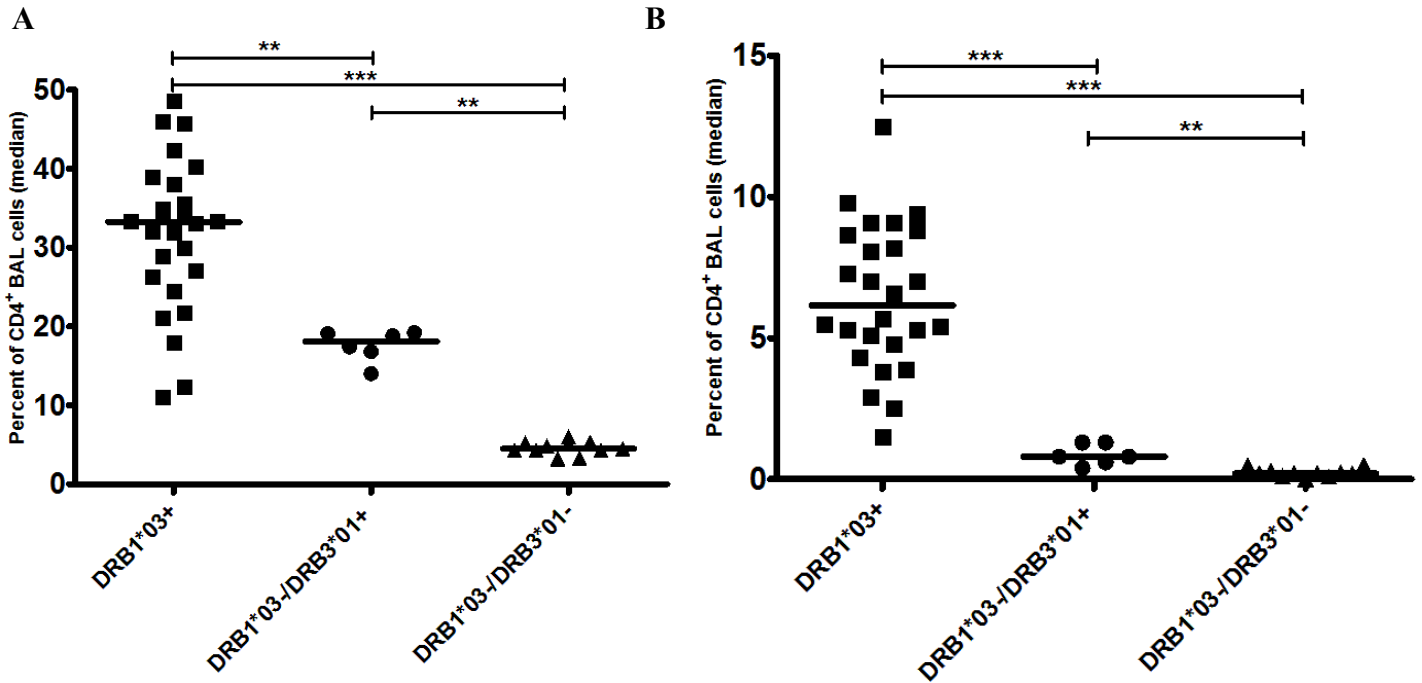

(A) \*\*\*  $p < 0.0001$ , \*\*  $p = 0.0048$ , \*\*  $p = 0.0032$

(B) \*\*\*  $p < 0.0001$ , \*\*\*  $p = 0.0008$ , \*\*  $p = 0.0073$

Figure S2. Representative gating strategy for flow cytometry analysis of the percentage of  $V\alpha 2.3^+$   $CD4^+$  T cells expressing  $V\beta 22$ , and vice versa.

Populations are expressed as percent of  $CD3^+$   $CD4^+$   $V\alpha 2.3^+$  or  $V\beta 22^+$  T cells in BAL fluid.

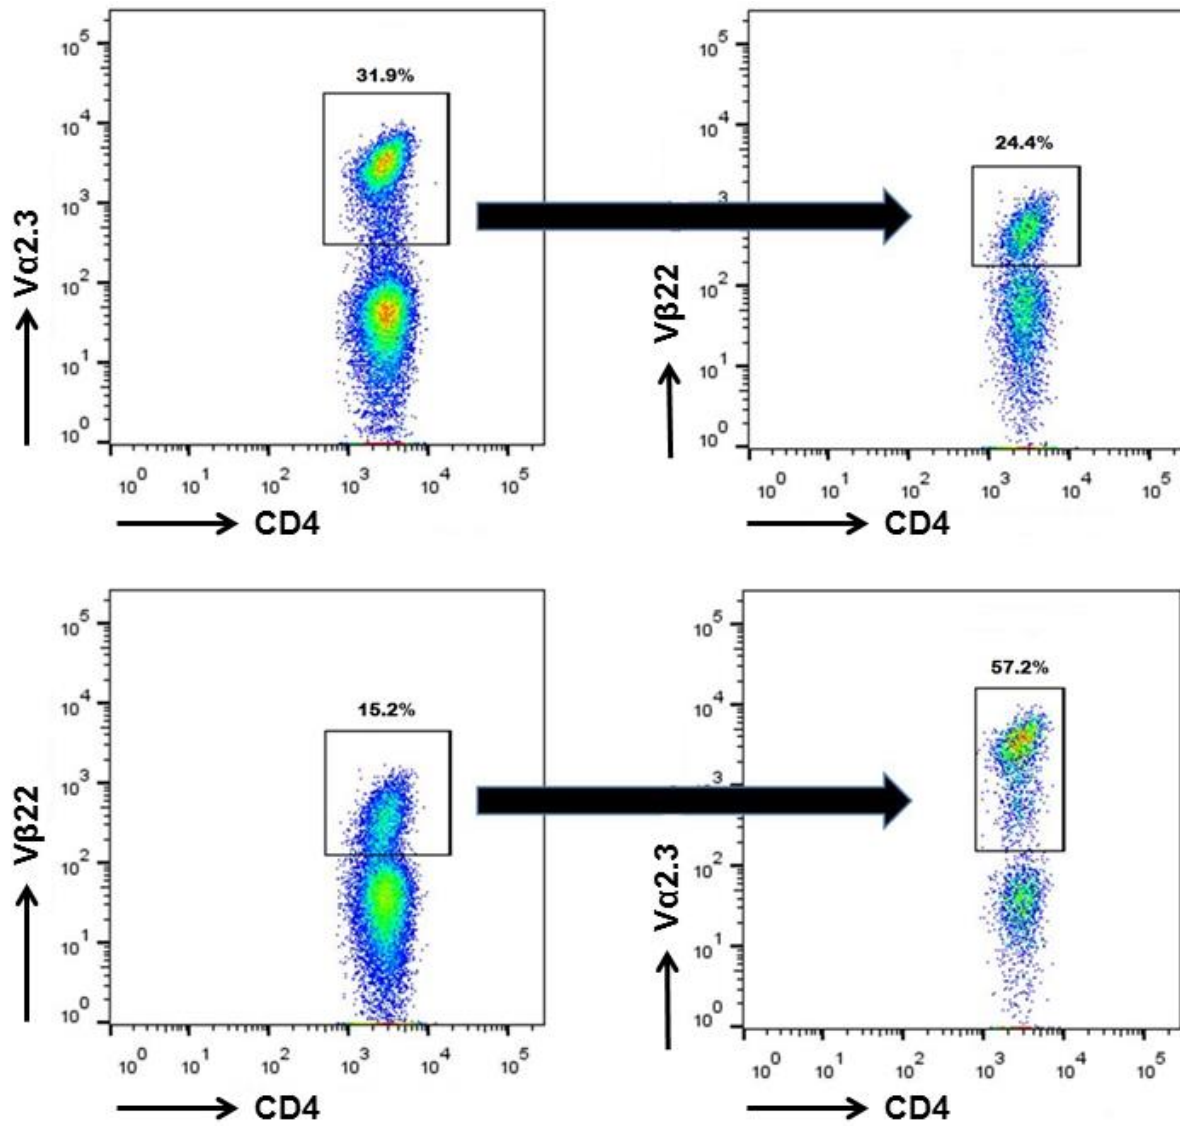

**Figure S3. Amino acid frequencies per TCR  $\beta$  chain CDR3 position.**

**Amino acid frequencies are summarised for TCR  $\beta$  chain CDR3 sequences from IMGT reference and sarcoidosis groups (patients 1-7) and colour-coded by amino acid property.**

**At position 112, the amino acid arginine occurs more frequently than expected in the sarcoidosis group in comparison with the reference group ( $p = 0.0003$ ). Figures were generated with the aid of IMGT Junction Analysis Tool (S3, S7). For the reference group, positions between 111 and 112 have been omitted in the figure.**

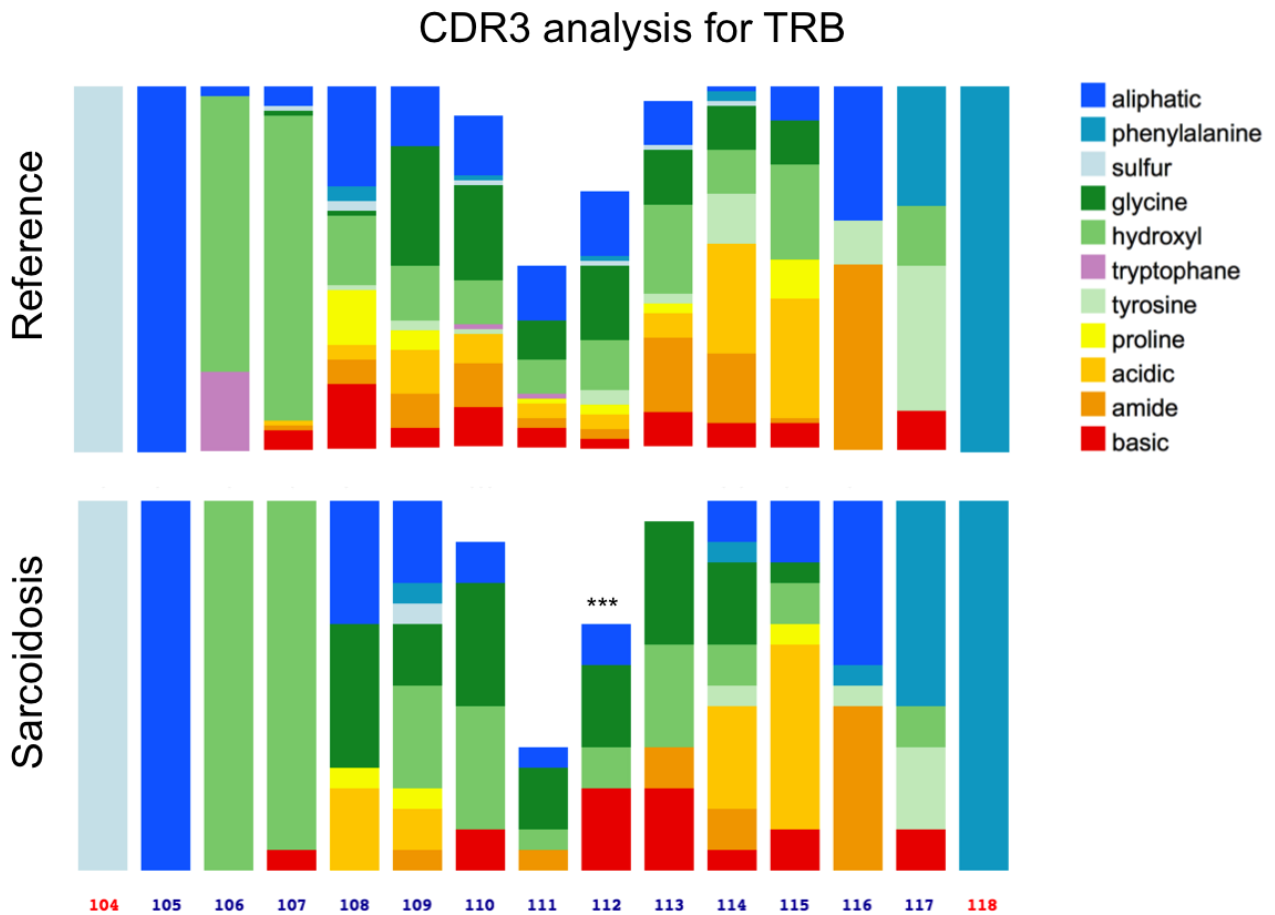

Supplement: ERJ-01209-2015_Suppl.pdf [file ERJ-01209-2015_Suppl.pdf]
